# Supplementary material
Source: MDPI journal article supplement (https://www.mdpi.com/2073-4441/10/01/23)
Supplement: s1 [file s1]

## Supplementary materials

Article

# Integrated Assessment of Shallow-Aquifer Vulnerability to Multiple Contaminants and Drinking-Water Exposure Pathways in Holliston, Massachusetts

Birgit Claus Henn <sup>1,\*</sup>, Yelena Ogneva-Himmelberger <sup>2</sup>, Allegra Denehy <sup>3</sup>, Marcie Randall <sup>3</sup>, Nichole Cordon <sup>3</sup>, Bilin Basu <sup>2</sup>, Brian Caccavale <sup>2</sup>, Stefanie Covino <sup>2</sup>, Ravi Hanumantha <sup>2</sup>, Kevin Longo <sup>2</sup>, Ariel Maiorano <sup>2</sup>, Spring Pillsbury <sup>2</sup>, Gabrielle Rigutto <sup>2</sup>, Kelsey Shields <sup>2</sup>, Marianne Sarkis <sup>2</sup> and Timothy J. Downs <sup>2</sup>

<sup>1</sup> Department of Environmental Health, Boston University School of Public Health, Boston, MA 02118, USA

<sup>2</sup> Department of International Development, Community, and Environment, Clark University, Worcester, MA 01610, USA; yogneva@clarku.edu (Y.O.-H.); bilinbasu@gmail.com (B.B.); bcaccavale@kleinfelder.com (B.C.); scovino@massaudubon.org (S.C.); RHanumantha@clarku.edu (R.H.); hardhatcity@gmail.com (K.L.); ariel.mm112@gmail.com (A.M.); SPillsbury@clarku.edu (S.P.); GRigutto@kleinfelder.com (G.R.); kelseyshields@gmail.com (K.S.); msarkis@clarku.edu (M.S.); tdowns@clarku.edu (T.J.D.)

<sup>3</sup> Holliston Community Members, MA 01746, USA; ajdenehy@comcast.net (A.D.); marcierandall@gmail.com (M.R.); nichole.cordon@gmail.com (N.C.)

\* Correspondence: bclaus@bu.edu

Received: 28 November 2017; Accepted: 22 December 2017; Published: date

### Water Treatment for Manganese and Iron

“Wells #4, #6 and #7 receive filtration. The water pumped from these wells is filtered at water treatment plants to remove the iron and manganese. Removal generally requires a two-step process of oxidation and filtration. Oxidation is accomplished by adding an oxidant such as chlorine or potassium permanganate to the water. This causes the iron and manganese to form tiny particles. Once this happens, the water passes through special filters consisting of material (greensand) that is specifically designed to capture iron and manganese particles. Over time, filters clog and are cleaned using a high-flow backwash process. Chlorine is added for disinfection during the filtration process to provide a chlorine residual throughout the distribution system.”
